# Cycling Physicochemical Gradients as ‘Evolutionary Drivers’: From Complex Matter to Complex Living States

Jan Spitzer

Mallard Creek Polymers, Inc., R&D Department, 14700 Mallard Creek Rd., Charlotte, NC USA 28262

[jspitz@mcpolymers.com](mailto:jspitz@mcpolymers.com); [jan.spitzer@gmail.com](mailto:jan.spitzer@gmail.com)

Ph. 704 887 9455 (office); 704 846 7792 (home)

Keywords: complexity, bacteria, physical chemistry, molecular forces, cycling environmental gradients, emergence, molecular evolution, living states, origin of life

## Highlights

- Biological complexity cannot be reduced to chemistry and physics
- Complex living states are: multicomponent, multiphase, ‘crowded’, and *re-emergent*
- Living states arise naturally *only* by the action of cycling physicochemical gradients
- Bacterial cells can be modeled as viscoelastic capacitors with sol-gel transitions
- Evolving living states can be investigated via ‘biotic soup’ experimentation
- Darwinian evolution arises from the process errors of the cell cycle
- Synthetic biology heralds the transition from unintentional Darwinian evolution to intentional anthropic evolution

43 **Abstract**

44

45 Within the overlap of physics, chemistry and biology, complex matter becomes ‘more  
46 deeply’ understood when high level mathematics converts regularities of experimental  
47 data into scientific laws, theories, and models (Krakauer et al., 2011. *The challenges and*  
48 *scope of theoretical biology*. J. Theoret. Biol. 276: 269-276). The simplest kinds of  
49 complex biological matter are bacterial cells; they appear complex—from a  
50 physicochemical standpoint—because they are multicomponent, multiphase,  
51 biomacromolecularly crowded, and re-emergent; the property of re-emergence  
52 differentiates biological matter from complex chemical and physical matter.

53 Bacterial cells cannot self-reassemble spontaneously from their biomolecules and  
54 biomacromolecules (via non-covalent molecular forces) without the action of external  
55 ‘drivers’; on Earth, such drivers have been diurnal (cycling) physicochemical gradients,  
56 *i.e.* temperature, water activity, etc. brought about by solar radiation striking the Earth’s  
57 rotating surface. About 3.5 billion years ago, these cycling gradients drove complex  
58 chemical ‘prebiotic soups’ toward progenotic living states from which extant bacteria  
59 evolved (Spitzer and Poolman, 2009; *The role of biomacromolecular crowding, ionic*  
60 *strength and physicochemical gradients in the complexities of life’s emergence*.  
61 *Microbiol. Mol. Biol. Revs.* 73:371-388). Thus there is historical non-equilibrium  
62 continuity between complex ‘dead’ chemical matter and complex living states of bacterial  
63 cells. This historical continuity becomes accessible to present-day experimentation, when  
64 cycling physicochemical gradients act on ‘dead’ biomacromolecules obtained from  
65 (suitably) killed bacterial populations – on a ‘biotic soup’ of chemicals (Harold, 2005,  
66 *Molecules into cells: specifying spatial architecture*. *Microbiol. Mol. Biol. Rev.* 69:544-  
67 564). The making of biotic soups and recovering living states from them is briefly  
68 discussed in terms of novel concepts and experimental possibilities.

69 In principle, emergent living states contingently arise and evolve when cycling  
70 physicochemical gradients continuously act on complex chemical mass; once living states  
71 become dynamically stabilized, the inevitable process errors of ‘primitive’ cell cycles  
72 become the roots of Darwinian evolution.

73

74

75

76

77

78

79

80

81

82

83

84

85

86

87

88

- 89 1. Introduction
- 90 1.1. The autonomy of physics, chemistry and biology
- 91 1.2. Speculation and facts: *Bathybius haeckelii*
- 92 1.3. Conceptual quandary: ‘the designers’
- 93 2. Why do bacterial cells appear so complex?
- 94 2.1. Ionic and Multicomponent
- 95 2.2. Multiphase
- 96 2.3. ‘Crowded and supercrowded’
- 97 2.4. Re-emergent
- 98 3. Experiments with ‘Bacterial Biotic Soups’
- 99 3.1. Making ‘biotic soup’
- 100 3.2. ‘Putting Humpty-Dumpty together again’
- 101 4. Bacterial cells as evolving chemical micro-reactors
- 102 4.1. The ideal bacterial cell
- 103 4.2. The process errors of the cell cycle
- 104 4.3. Is evolution directional toward increasing complexity?
- 105 4.4. The future of *Homo sapiens*’s evolution
- 106 5. Conclusions

107

108

109

110

111

112 (i) In physical science a first essential step in the direction of learning any subject is to  
113 find principles of numerical reckoning and practicable methods for measuring some  
114 quality connected with it. I often say that when you can measure what you are speaking  
115 about, and express it in numbers, you know something about it; but when you cannot  
116 measure it, when you cannot express it in numbers, your knowledge is of a meager and  
117 unsatisfactory kind; it may be the beginning of knowledge, but you have scarcely in your  
118 thoughts advanced to the stage of science, whatever the matter may be.

119

Lord Kelvin (1883)

120

121

122

123 (ii)...we have learned to appreciate the complexity and perfection of the cellular  
124 mechanisms, miniaturized to the utmost at the molecular level, which reveal within the  
125 cell an unparalleled knowledge of the laws of physics and chemistry

126

Albert Claude (1974)

127

128

129

130 (iii) This attempt to isolate cell constituents might have been a failure if they had been  
131 destroyed by the relative brutality of the technique employed. But this did not happen.

132

Albert Claude (1974)

133

134

## 135 **1. Introduction**

136

137 The emergence of cellular life, both in the context of life's historical origins and  
138 current research on 'synthesizing life', is one of the most complicated and least  
139 understood natural phenomena (Bernal, 1967; Lahav, 1999; Szostak et al., 2001; Luisi,  
140 2006; Rassmusen et al., 2008; Gibson et al., 2010; Church & Regis, 2012). Arguably, the  
141 Big Bang about ~13.6 billion years ago is better documented (by cosmic microwave  
142 background radiation) than the chemical and physical processes that can give rise to living  
143 cells.

144 The fact that living cells are non-equilibrium chemical systems suggests that life can  
145 emerge *only* from non-equilibrium chemical systems. Chemical non-equilibrium systems  
146 that continuously evolve arise naturally when solar irradiation strikes the surfaces of  
147 rotating planets (Spitzer & Poolman, 2009). The resulting cycling gradients of  
148 temperature, water activity, radiation, etc. drove planetary chemistries – the Earth's  
149 'prebiotic soup' of chemicals (Bada & Lazcano, 2003) – toward the contingent emergence  
150 of 'primitive life', and eventually toward progenotes and Last Universal Common  
151 Ancestors (Woese & Fox, 1977a, b; Woese 1998); at that point, about 3.5 billion years  
152 ago (Allwood et al., 2007), Earth's chemical evolution became coexistent with biological  
153 evolution. The 'bottom-up' processes of prebiotic evolution can be investigated in  
154 chemical engineering simulators of Hadean Earth, with planetary sciences and  
155 geochemistry defining plausible initial conditions (Spitzer, 2013).

156 In this review, I take a complementary 'top-down' biological perspective and argue  
157 for experiments with cycling physicochemical gradients that act on a complex mixture of  
158 biomacromolecules obtained by killing a population of bacteria; the resulting 'biotic soup'  
159 contains all the 'biochemistry' needed to make living states emerge *de novo*. These  
160 experiments will clarify how the 'architecture of living states' – their spatiotemporal  
161 structuring – evolves from a mixture of 'dead' biomolecules and biomacromolecules  
162 (Harold, 2005).

163 As this approach reduces the complexity of life's emergence to a well-defined though  
164 still very complicated *physicochemical* process, I will start – by way of an extended  
165 introduction – with general observations on the complexities of matter as differentiated by  
166 physics, chemistry and biology, on the irreducibility of biology to chemistry and physics,  
167 and on the transition from plausible speculations about life's emergence to the new  
168 sciences of astrobiology and synthetic protocell biology (*cf.* Lord Kelvin counsel [i]).  
169 These introductory points expound the unique quandary of Darwinian (biological)  
170 evolution – the elusive nature of 'life's designers or drivers': they are here rendered as  
171 persistently cycling physicochemical gradients.

172

### 173 **1.1. The autonomy of physics, chemistry and biology**

174

175 Theories and models of physics and chemistry have an extraordinary explanatory  
176 power derived from extensive use of high-level mathematics; in comparison, biology is  
177 generally perceived as having a different (less quantifiable) theoretical foundation (Mayr,  
178 1996, 2007; Krakauer, 2011; Phillips *et al.*, 2009). Yet cytologists have known for some  
179 time that the living cell – the unit of biological matter – knows within itself the laws of  
180 physics and chemistry better than we can currently understand them; that there is nothing

181 else within the cell but chemistry and physics – no teleological force to guide its  
182 evolution, no chance to play the tape of evolution again (Hinshelwood, 1946; Gould,  
183 1989; cf. Albert Claude’s observation [ii]). We thus remain astonished at the  
184 physicochemical complexity of the cell, especially the spatiotemporal complexities of  
185 very small bacterial cells during their cell cycle – how they function as unique  
186 electrochemical systems converting environmental chemicals and energy into copies of  
187 themselves (Mitchell, 1979; Spitzer & Poolman, 2005, 2009, 2013; Spitzer, 2011). The  
188 question then is this: “How could simple (bacteria-like) cells come about *de novo* – now,  
189 in the laboratory, or at any time in the Universe?”

190 Physics explains inanimate matter in terms of partial differential equations, be they  
191 Newton’s equations of classical mechanics, Maxwell’s equations of electromagnetism,  
192 Schrödinger’s equation of quantum mechanics, or many other equations of mathematical  
193 physics. Such physical understandings, written down in the symbolic shorthand of  
194 advanced mathematics, were derived from simpler algebraic (phenomenological) laws,  
195 which summarized large amounts of numerical ‘regularities’ of experimental data (cf.  
196 Lord Kelvin’s comment [i], Krakauer, 2011). In physics, there are many such laws, such  
197 as Coulomb’s law of static electricity, Newton’s law of gravitation, Ohm’s and Kirchoff’s  
198 laws of electrical circuits, etc., which have been generalized into powerful theories of  
199 (mathematical) physics, often prized for their ‘beauty’ and internal self-consistency.

200 Chemistry has fewer differential equations, perhaps the most important being the  
201 equations of chemical thermodynamics and chemical kinetics; compared to physics,  
202 chemistry relies more on empirical laws and models (*e.g.* Faraday’s laws of  
203 electrochemistry, Guldberg-Waage’s law of mass action, Langmuir’s adsorption  
204 isotherm). Such chemical laws are sometimes understood through *ideal* (Platonic) models  
205 of *actual* matter, for example ideal solution, ideal conductor, ideal crystal and so forth,  
206 which more realistic models may approach under particular conditions. For example, the  
207 finite size of molecules and non-covalent attractive forces between them are accounted for  
208 in the van der Waals equation of real gases or the Debye-Hückel theory of electrolytes.

209 Biology has still fewer differential equations than chemistry; perhaps the best known  
210 is the Lotka-Volterra system of non-linear equations for prey-predator population  
211 dynamics. There are also fewer empirical laws, for example the statistical laws of  
212 Mendelian genetics, the Monod and other models of bacterial growth, and Michaelis-  
213 Menten enzyme kinetics (which is essentially a chemical model). The lesser degree of  
214 quantification in biology arises from the fact that living cells and organisms are too  
215 complex (or complicated) in relation to inanimate matter. Experiments with populations  
216 of bacterial cells are harder to quantify than those with ‘dead’ chemicals, because  
217 individual cells do not stay *chemically identical* as they increase in volume and split into  
218 two ‘imperfect’ copies – or in biologists’ language, ‘as they reproduce and evolve’; at  
219 cellular and subcellular levels, populations of bacterial cells are inherently heterogeneous  
220 (Neidhardt *et al.*, 1990; Kell *et al.*, 1991; Losick & Desplan, 2008). In comparison, a  
221 glycerol molecule for example, no matter by which chemical reaction it is (re)produced, is  
222 a rather constant and stable entity, carbon isotope effects notwithstanding.

223 Some aspects of cellular complexity can be understood when we consider the  
224 complexity of matter in general, going from physics to chemistry and from chemistry to  
225 biology. Physics deals with mass – *everything* has some mass (measured in kilograms);  
226 laws governing physical mass do not depend on its chemical composition, *e.g.* Newton’s

227 laws of gravitation or viscosity. Chemistry differentiates mass as chemical mass with an  
228 *infinity of molecules and ions*, including charged and uncharged polymers, all made up  
229 from about 90 kinds of elemental atoms, and all having distinct atomic and molecular  
230 masses (measured in grams per mole). Biology differentiates chemical mass as ‘living’  
231 mass made up from an *infinity of biological cells*, all of them (or most, at any rate) having  
232 genes encoded by nucleic acids (measured in base-pairs). The totality of genes defines the  
233 identity of the cell and guides its reproduction during the cell cycle in a given  
234 environment. Thus chemistry and biology are autonomous sciences (Mayr, 1996, 2007)  
235 dealing with their own ‘infinite kinds’ of complex matter, undergirded by the general laws  
236 of (mathematical) physics; however, where these sciences overlap, they provide a  
237 ‘deeper’, more fundamental (mathematical) understanding of the complexity of matter in  
238 general, no matter whether the initial impetus comes from physics, chemistry or biology.

239 Physics, particularly nuclear physics and quantum physics, clearly, has been  
240 astonishingly successful in explaining the origin, structure and properties of atoms (and  
241 hence the fundamental understanding of the periodic table and chemical bonds), and in  
242 theorizing about natural phenomena (*e.g.* interactions of electromagnetic radiation with  
243 matter that led to a multitude of spectroscopic methods, or the band theory of electrical  
244 conductors and semi-conductors that gave vacuum tubes, transistors, integrated circuits  
245 and sophisticated electronic devices). Physical instrumental techniques have proven  
246 immensely useful to chemists and biologists; X-ray diffraction in particular has become a  
247 key tool to determine the molecular structures of a multitude of polymeric materials, *e.g.*  
248 alumino-silicates (Pauling,), proteins (Perutz, Kendrew), and nucleic acids – the famous  
249 X-ray spots of Franklin’s DNA preparations that yielded the *chemical* explanation of  
250 biological heredity by Watson, Crick and Wilkins. However, physics cannot predict the  
251 *infinite* number of possible chemical molecules, particularly polymers whose molecular  
252 mass may become very large (approach ‘*infinity*’); physics cannot predict the stability of  
253 chemical compounds when exposed to different environmental conditions (*e.g.* water,  
254 temperature, irradiation), and physics cannot predict the methods of their syntheses  
255 (Krakauer, 2011).

256 Biochemistry, *i.e.* chemistry applied to compounds synthesized by biological cells,  
257 has determined the atomic compositions of biomolecules and biomacromolecules, their  
258 3-D spatial structures including their chirality, their chemical and catalytic reactivities *in*  
259 *vitro* and their membranous, metabolic, and genetic functions. In particular, biochemistry  
260 has established: that all biochemical compounds have the same chemical properties,  
261 whether produced enzymatically by cells or by independent synthetic routes of organic  
262 chemistry; that all cells have the same but variable polymeric chemistry of nucleic acids,  
263 proteins, and carbohydrates, with just a few low molecular weight ‘building blocks’ and  
264 intermediates, including membrane-forming lipids and the ‘high-energy’ intermediates  
265 such as ATP and GTP; and biochemistry established that there exists a universal genetic  
266 code for all living cells and organisms and similar enzymatic mechanisms for regulating,  
267 transcribing and translating this code into proteins. Thus, there is a chemical unity to all  
268 life, and on that basis, molecular phylogenetics (Zukerkandl & Pauling, 1965; Woese,  
269 1998; Pace *et al.*, 2012) suggests the historical existence of Last Universal Common  
270 Ancestors (LUCAs), when life began its Darwinian evolution on Earth about 3.5 billion  
271 years ago. However, biochemistry cannot predict the infinite number of possible  
272 biological cells and multicellular organisms, their appearances and dying-out as species,

273 their interactions with variable environments and with each other, and the results of their  
274 continuing (non-equilibrium) evolution in general.

275 Taken together, the above considerations suggest that research at the ‘triple’ overlap  
276 of bacteriology, biochemistry and biophysics, could identify, at least operationally, the  
277 physicochemical mechanisms of how ‘living states’ come about from lifeless mixtures of  
278 biomolecules and biomacromolecules (Harold, 2005).

279

## 280 **1.2. Speculation and facts: *Bathybius haeckelii***

281

282 Neither physics nor chemistry have shed much light on the physicochemical  
283 mechanisms of the cell cycle that a bacterial cell ‘knows’ so well, extending Albert  
284 Claude’s observation (ii) to bacterial cells, and which are embodied in Virchow’s dictum  
285 *omnis cellula e cellula*. These ‘unknown’ physicochemical mechanisms are closely  
286 related to the ‘old’ questions of the emergence of cells *de novo* – the origin of life and its  
287 Darwinian evolution. Darwin was perhaps the first to suggest the emergence of life from  
288 lifeless *chemical* matter: he informally speculated that ‘primitive life’ might have  
289 emerged on early Earth in a ‘warm pond’ full of ammonium phosphates. (Remarkably,  
290 Darwin specified thermophilic conditions and singled out phosphate – the ionic form of  
291 phosphorus, which turned out as life’s crucial chemical element – for both metabolism  
292 and genetics).

293 How the issue of ‘spontaneous generation of life’ was put to rest by Pasteur’s dictum  
294 ‘*omne vivum ex vivo*’ is worth reiterating: Pasteur and his predecessors (*e.g.* Redi,  
295 Spallanzani and their ‘mistaken’ opponents) established qualitative (observational) *facts*,  
296 a pre-requisite to conduct quantitative and repeatable experiments – and then theorize  
297 about them (*cf.* Lord Kelvin’s counsel [i]). Thus Darwin, Pasteur and Virchow regarded  
298 the question of life’s emergence *de novo* as too intractable to deal with, being gratified  
299 with the *factual* generalization: ‘all life only from life’. Thomas Huxley’s honest  
300 ‘mistake’ of regarding soft, gel-like inanimate matter as a new species of ‘primitive life’,  
301 *Bathybius haeckelii*, is noteworthy in this regard (Rice, 1983; Welch, 1984).

302 Even though our knowledge of life’s emergence *de novo* has remained speculative  
303 (Oparin, 1924; Bernal, 1967; Shapiro, 1986), such speculations do represent the beginning  
304 of scientific knowledge, which ought to lead to sound hypotheses and quantitative  
305 experimentation (*cf.* Lord Kelvin’s counsel [i]). Starting with Stanley Miller’s  
306 experiments (Miller, 1953) that demonstrated the synthesis of small biomolecules under  
307 pre-biological conditions (Bada & Lazcano, 2003), speculations about life’s emergence  
308 have now begun their transition into new biological sciences:

- 309 (i) **Astrobiology**, which deals with the *historical* issues of the emergence of first cells  
310 (Gilmore & Sephton, 2004; Sullivan *et al.*, 2007; Lahav, 1999; Fry, 2000; Deamer,  
311 2011); the primary drivers for their emergence were persistently cycling, chemical  
312 disequilibria arising from solar irradiations of rotating planetary surfaces (Rothschild,  
313 2003; Spitzer & Poolman, 2009; Spitzer, 2013; Stüeken *et al.*, 2013); and  
314 (ii) **(Semi)synthetic protocell biology**, which deals with *contemporary* laboratory  
315 constructions of protocells (vesicles) that enclose designed systems of genetic circuits  
316 and their metabolic and regulatory components (Szostak *et al.*, 2001; Luisi, 2006;  
317 Solé, 2007; Mann, 2012; Rassmusen *et al.*, 2008; Nandagopal & Elowitz, 2011;

318 Purnick & Weiss, 2009; Kwok, 2010; Noireaux *et al.*, 2011; Schwille, 2011; Benner  
319 & Sismour, 2005; Church & Regis, 2012; Gibson *et al.*, 2010; Elowitz & Lim, 2010).  
320 Neither of these approaches has yet demonstrated a plausible emergence or construction  
321 of cellular life *de novo*, the inherent technical challenges being compounded by the  
322 question ‘What is life?’ (Pross, 2011, 2013; Benner, 2010; Trifonov, 2012; Szostak, 2012;  
323 Spitzer, 2013).

324

### 325 **1.3. Conceptual quandary: the ‘designers’**

326

327 From a physicochemical standpoint, a complex bacterial cell cannot self-(re)assemble  
328 *spontaneously* (via attractive non-covalent molecular forces) without the action of  
329 external agents or ‘designers’ – be they natural (unintentional), *e.g.* Earth’s dynamic  
330 diurnal environments (Spitzer & Poolman, 2009; Spitzer, 2013), or anthropic (intentional)  
331 such as the brain’s capacity to ‘design and build’ (Szostak *et al.*, 2001; Gibson *et al.*,  
332 2010; Elowitz & Lim, 2010) – or yet to be discovered.

333 This conceptual quandary suggests an experimental approach where the driving force  
334 for biological self-assembly and evolution are cycling gradients of temperature, water  
335 activity and electromagnetic irradiation acting on mixtures of dead biomolecules and  
336 biomacromolecules; specifically, I suggest ‘making life emerge *de novo*’ from a lifeless  
337 mixture of *all* biochemicals of which a bacterial cell is composed. Such a biochemical  
338 mixture – a ‘dead (unstructured) biotic soup’ (Harold, 2005) – can be obtained by *gently*  
339 killing a living bacterial population (*cf.* Albert Claude’s observation [iii] about the  
340 *brutality* of killing eukaryotic cells). I briefly discuss how to make biotic soups and  
341 recover ‘living states’ from them by applying physicochemical gradients. I conclude that  
342 there exists *cycling non-equilibrium continuity* between ‘life’ and ‘non-life’, *i.e.* being  
343 alive and reproducing, or being dead (Davey, 2011).

344

345

## 346 **2. Why do bacterial cells appear so complex?**

347

348 I take a simplifying physicochemical approach to understanding (biological, bacterial)  
349 complexity, which has been described in terms such as: emergent behavior, self-assembly,  
350 non-linearity, pattern-formation, dissipative self-organized structures, operating ‘on the  
351 edge of chaos’, fragile yet robust, hierarchical networks, feedback loops, system control,  
352 catastrophic cascades, autocatalytic cycles of ‘replicators’, ‘order out of chaos’,  
353 biosystems, etc. (Adami *et al.* 2000; Goldenfeld & Kadanoff, 1999; Schliwa, 2002;  
354 Mazzocchi, 2008; Krakauer, 2011; Csete & Doyle, 2002; Hazen, 2005; Van Regenmortel,  
355 2004; Bertalanffy, 1950; Qian, 2011; Kell & Welch, 1991; Whitesides & Ismagilov,  
356 1999). Some of these concepts, borrowed from network and process control engineering,  
357 are realized in solid-state electronic devices of telecommunication and chemical  
358 manufacturing processes, including computer-controlled sensors and regulators.

359 Disregarding the issue of ‘design and designers’ for a moment, the chemical basis of  
360 electronic devices lies in the semi-conducting properties of doped silicon and similar  
361 materials. The obvious difference between the solid-state operation of electronic ‘chips’  
362 and the functioning of biological cells is the soft, semi-liquid (partly gelled) nature of  
363 cells (Bray, 2005, 2009; Fels *et al.*, 2009; Spitzer & Poolman, 2013), which allows for the



364 possibility of their *natural self-reproduction*: two bacterial cells arise from one by about  
365 1500 kinds of parallel and sequential biochemical reactions, sometimes in less than 30  
366 minutes if external environment (nutrient medium) is favorable; ‘life’ in the solid state  
367 only (no molecular translational motion) where molecules ‘sit’ is harder to imagine  
368 ([http://schaechter.asmblog.org/schaechter/2013/03/feynman-said-just-look-at-the-thing-](http://schaechter.asmblog.org/schaechter/2013/03/feynman-said-just-look-at-the-thing-.html)  
369 [.html](http://schaechter.asmblog.org/schaechter/2013/03/feynman-said-just-look-at-the-thing-.html)). Biological cells are therefore materially and functionally far more complicated  
370 than electronic computers to which they are sometimes likened (Danchin, 2009). Such  
371 electronic devices operate in the absence of chemical reactions in *spatiotemporally fixed*  
372 *designs* of semi-conducting silicon chips. Still, as a common denominator, both  
373 (designed) solid-state electronic devices and (non-designed, evolving) ‘soft’ biological  
374 cells conduct *electrical charges* – but of vastly different kinds and by vastly different  
375 mechanisms – and generate self-regulated electrical potentials. In that sense, bacterial  
376 cells have a ‘brain function’ that has the same physical basis as computers and other  
377 biological cells (particularly cells of nerve tissues): the storage and movement of  
378 electrical charges, including their ‘creation’ and disappearance by chemical reactions.

379 The physicochemical complexity of bacterial cells lies in several interdependent  
380 characteristics: (i) ionic and multicomponent, (ii) multiphase, (iii) ‘crowded’ (highly  
381 concentrated), and (iv) self-regulated and re-emergent. The first three characteristics  
382 define ‘complex chemical matter’; it can be either *equilibrated* (‘definitely dead’), or  
383 *kinetically arrested* away from equilibrium (‘dead’ but able to resume its chemical  
384 reactions in the future); or it can be in a *steady state*, chemically reacting but not evolving,  
385 its properties being independent of time; or it can be in a *non-steady state*, chemically  
386 reacting and *evolving* in time – the pre-requisite state of complex chemical matter from  
387 which living states can emerge and evolve. The fourth characteristic is quintessentially  
388 biological, as *self-regulation of re-emergence* requires the cyclic maintenance of chemical  
389 and physical identity – in biological language, the maintenance and continuation of the  
390 genome (nucleoid, plasmids, and even phages) and of the membrane (cell envelope)  
391 during the cell cycle. These four elements are further discussed below.

392

## 393 **2.1. Ionic and Multicomponent**

394

395 Bacterial cells are composed of many kinds of chemical compounds, of a very wide  
396 range of ionic character, molecular weights, and hydrophobicity, from small ions and  
397 molecules in the sub-nanometer range to ‘enormous’ polyelectrolytes (nucleic acids) in  
398 the micrometer range; a great deal of biochemistry has been concerned with their isolation  
399 and purification, and with determinations of their chemical compositions, 3-D chemical  
400 structures, *in vitro* biochemical reactivity and self-assembly, and their cellular  
401 localizations and physiological functions. There are relatively few strictly *uncharged*  
402 biomolecules (and no biomacromolecules) in a bacterial cell, except for ‘special cases’ of  
403 amphoteric compounds like proteins at their isoelectric points, or zwitter-ionic lipids and  
404 similar compounds derived from choline. Uncharged ‘food’ molecules are normally  
405 available in ionic form, *e.g.* carbon dioxide as hydrogen carbonate ion, or they are first  
406 converted by kinases to anionic organic phosphates in order to become available to cell’s  
407 biochemistry.

408

409 In a bacterial cell, there are over 1000-2000 kinds of proteins, many kinds of RNAs,  
plus a single DNA polymer, and 3-6 kinds of phospholipids; there are also ‘inorganic’

410 chemicals of non-biological origin that are important reactants or catalysts (widely  
411 available from the environment), chief being water, carbon dioxide, nitrogen and oxygen,  
412 and inorganic ions, importantly potassium, sodium, magnesium, calcium, iron,  
413 bicarbonate, mono- and di-hydrogen phosphates and sulfate and chloride; multivalent  
414 cations (Fe, Mg, Ca) are normally sequestered in ‘organic’ molecules and biomolecules,  
415 their free concentrations being extremely low. Physicochemical interactions between  
416 bacterial biomolecules and biomacromolecules enable the functioning of cellular  
417 biological mass, mediated by water and simple inorganic ions. The effects of ions are  
418 sometimes manifested in an unexpected manner, *e.g.* the initiation of embryological  
419 development of unfertilized sea urchin eggs by a specific solution of mixed salts (Loeb,  
420 1899, 1906; Pauly, 1987). Water molecules and simple ions participate in many  
421 biochemical reaction pathways (synthetic, degradative and signaling), and in this  
422 *chemical* sense cellular life depends critically on *aqueous* (multicomponent) electrolyte  
423 (Spitzer & Poolman, 2005; Spitzer, 2011). There is likely no biochemical reaction that  
424 does not feature water or some ‘aqueous ionic species’, either as reactants or products, or  
425 catalysts.

426 These ‘rough’ compositions, discussed in detail in current textbooks (Neidhardt, *et al.*,  
427 1990, White, 2000; Phillips *et al.*, 2008; Schaeter *et al.*, 2006; Kim & Gadd, 2008),  
428 support the contention that a bacterial cell operates within an electrochemical paradigm  
429 that includes ‘battery-like’ electrolytic conduction (Mitchell, 1979), because essentially  
430 all macromolecular components (the nucleoid, protein-protein complexes, protein-RNA  
431 complexes and their clusters) are charged and dissolved or dispersed in cytoplasmic water  
432 of relatively high ionic strength; changes of ionic strength of external environments are  
433 converted to localized ionic changes within the cytoplasm, activating constitutive  
434 membrane proteins or genetic circuits within the nucleoid (Higgins *et al.*, 1987; van der  
435 Heide *et al.*, 2001). The bacterial membrane is also ionic – it contains anionic lipids  
436 (Yeung *et al.*, 2008), including highly charged cardiolipin (Koppelman *et al.*, 2001;  
437 Romantsov *et al.*, 2008) and ‘semi-conducting’ membrane proteins. Finally, as viewed  
438 from the nutrient medium, the bacterial cell *in toto* is electrically charged, in a complex  
439 and patchy manner, as evidenced by cells’ electrophoretic motion in an external electric  
440 field (van Loosdrecht *et al.*, 1987; Bayer & Sloyer, 1990; de Kerchove & Elimelech,  
441 2005).

442

## 443 **2.2. Multiphase**

444

445 On account of the physicochemical variety of bacterial biomacromolecules (charged,  
446 hydrophobic, hydrophilic), *attractive* non-covalent molecular forces bring about  
447 multicomponent ‘phase separations’. The attractive forces responsible for the existence  
448 of liquid phases in general are van der Waals forces and ion-dipole and similar ‘Debye’  
449 type polar forces; however, the most important ‘cytological’ non-covalent forces are  
450 hydrogen bonding (Pauling *et al.* 1951; Eisenberg, 2003), the hydrophobic effect  
451 (Tanford, 1980; Southall *et al.*, 2002), and (screened) electrostatic attractions between  
452 cationic and anionic biomacromolecules (Schreiber & Fersht, 1996; Halford, 2009). The  
453 crucial role of electrostatic attractions is also manifested by the bimodal distribution of  
454 isoelectric points of proteins (Spitzer & Poolman, 2009), with peaks in the alkaline pH  
455 region (negatively charged proteins) and acidic region (positively charged proteins); such

456 bimodal ('positive-negative') distributions are common across many proteomes (Kiraga *et*  
457 *al.*, 2007), suggesting that electrostatically assisted protein clustering (gelation) is a  
458 general cytoplasmic phenomenon of many kinds of cells. The effects of attractive forces  
459 are modulated by repulsive non-covalent forces, in particular by the excluded volume  
460 effect (Zimmermann & Minton, 1993), *i.e.* by the hydration stabilization of 'folded'  
461 macromolecules in water (Halle, 2004; Persson & Halle, 2008; Jasnin, 2009; Fenn *et al.*,  
462 2009) and by screened electrostatic repulsions between anionic molecular surfaces  
463 (Spitzer, 1984; 2003; Poolman *et al.*, 2004; Spitzer & Poolman, 2005).

464 The complexity of this physicochemical situation precludes any chances that a cell  
465 could 'self-assemble' *spontaneously* from its components, as shown by a simple  
466 Gedankenexperiment: in a large beaker of water, let us separate all the  
467 biomacromolecules and biomolecules and ions of a cell to infinity from each other and let  
468 then water evaporate from this 'infinitely dilute bacterial broth'. As the water evaporates,  
469 attractive non-covalent forces become operative and bring about phase separations;  
470 however, it is quite unlikely that a cell would re-form and 'start living' just by letting all  
471 the molecular surfaces come into close proximity when water evaporates. We are quite  
472 sure that randomly agglomerated and gelled materials will sequentially phase-separate as  
473 'dead' chemicals (Walter & Brooks, 1995; Stradner *et al.*, 2004; Kayitmazer *et al.*, 2007).  
474 Thus the existence and operation of (fundamental) *non-covalent* intermolecular forces  
475 cannot explain how a cell could self-assemble from its components, even though such  
476 forces are necessary (but not sufficient) to drive the formation of the membrane and of  
477 other biomacromolecular structures.

478 Other factors are at play, the clue being provided by bacterial physiology: the dynamic  
479 architecture of a bacterial cell *in vivo* depends on the *rate* of its growth (Neidhardt *et al.*,  
480 1990; Scott *et al.*, 2010; Wagner *et al.*, 2009), *i.e.* on the rate of synthesis and degradation  
481 of its components, like DNA, proteins, RNAs, ribosomes and its membrane (lipids and  
482 membrane proteins). It is on this dynamic process of biochemical reactions that the  
483 molecular non-covalent forces act, bringing about particular, time-dependent and  
484 localized phase separations of supramacromolecular structures – the dynamic architecture  
485 of the cell (Harold, 2005); this dynamic architecture is lost when cells are taken apart for  
486 analyses of their biochemical components.

487 Phase separations of any kind imply classical physicochemical concepts of high  
488 concentrations of partially miscible (or immiscible) systems and saturated solutions, and it  
489 has long been argued, both from biochemical and physicochemical standpoints (Ovadi &  
490 Srere, 1999; Zhou *et al.*, 2008) that *in vivo* 'crowding' is an important fact, the  
491 consequences of which have been somewhat neglected (Ellis, 2001).

492

### 493 **2.3. 'Crowded and Supercrowded'**

494

495 On a micrometer scale and on the seconds or minutes timescales, a textbook picture of  
496 a bacterial cell can be regarded as a system of four physicochemical 'phases' (each being  
497 also multicomponent): (i) the hydrophobic cell envelope of a particular geometrical shape  
498 (cocci, rod etc.), the key functional part being a lipid bilayer studded with a high  
499 number of many kinds of 'water-insoluble' proteins, (ii) the phase-separated nucleoid,  
500 portrayed like a bundle of 'spaghetti' representing anionic DNA helices condensed by  
501 cationic proteins and amines, (iii) the ribosomes, phase-separated clusters of proteins and

502 nucleic acids ('water *and* lipid insoluble'), shown as tiny spheres scattered throughout the  
503 cytosol (Alberts *et al.*, 2002), or attached to mRNA strands (polyribosomes) that are  
504 connected to DNA through RNA polymerase (Schaechter *et al.*, 2006), and (iv)  
505 'unstructured' cytoplasm, an aqueous solution or dispersion of proteins, nucleic acids,  
506 metabolites and ions. On this micrometer scale, cytoplasmic proteins are not shown  
507 because they are too small; at greater spatiotemporal resolutions, proteins and their  
508 (hetero)dimers and multimers (complexes) are shown 'randomly crowded' (Goodsell,  
509 2010), representing ~ 25% of the volume of the cytoplasm (Zimmerman & Trach, 1991).  
510 An important intracellular phenomenon is polymer incompatibility of hydrated nucleoids,  
511 plasmids and phages (mostly nucleic acids) with crowded cytoplasmic proteins  
512 (Valkenburg & Woldringh, 1984; Woldringh & Nanninga, 2006); this represents a major  
513 large-scale phase separation (compartmentation, or biomacromolecular localization)  
514 within the bacterial cytoplasm, a precursor phenomenon to the formation of the fully  
515 compartmentalized nucleus of eukaryotic cells.

516 Zooming down to nanometer scale and microseconds and longer timescales,  
517 biomacromolecular surfaces can be considered as smoothed-out, or averaged out, into  
518 four kinds of distinct physicochemical patches (Wang *et al.*, 2011; Spitzer, 2011):  
519 hydrophilic (capable of hydrogen bonding with water molecules), hydrophobic (unable to  
520 be accepted into the hydrogen-bonded network of water molecules), and positively or  
521 negatively charged (Poolman *et al.*, 2004). These 'smooth' chemical patches give rise to  
522 repulsive and attractive forces that determine to what degree a biomacromolecule is  
523 attracted to and oriented vis-à-vis its neighbors, *i.e.* its clustering propensity with other  
524 biomacromolecules, which can result in the formation of a gel phase of variable  
525 mechanical (viscoelastic) strength.

526 Simple physical models of such high crowding (Phillips *et al.* 2009; Spitzer &  
527 Poolman, 2009, Goodsell, 2010; Spitzer 2011) show that cytoplasmic biomacromolecules  
528 are essentially 'touching' *in vivo*, and thereby interacting strongly via repulsive non-  
529 covalent molecular forces (hydration and screened electrostatic repulsions) and thus  
530 avoiding catastrophic (fatal) large-scale agglomerations or precipitations (Pastore and  
531 Temussi, 2011). The functional clustering of biomacromolecules has been also theorized  
532 by the concept of metabolons, where reactants and products are shuttled between the  
533 catalytic sites within the cluster without bulk diffusion in the cytoplasm (Srere, 1985;  
534 Mathews, 1993, Ovadi & Srere, 1999), as modular hyperstructures (Norris *et al.*, 2007;  
535 Hartwell *et al.* 1999), and as various 'omes of system biology, such as FtsZ divisome  
536 (Lutkenhaus *et al.* 2012) which is synthesized and assembled before cell division takes  
537 place; some 'omes' have now been rendered visible (Bakshi *et al.*, 2012; Fu *et al.*, 2010;  
538 Greenfield *et al.*, 2009).

539 Within the supramacromolecular 'supercrowded clusters', also described as a  
540 'sieve-like meshwork' of cytoskeleton and other proteins (Mika *et al.* 2010) or a  
541 'poroelastic network' in the case of eukaryotic cells (Charras *et al.*, 2008), the  
542 biomacromolecules are separated by narrow channels filled with percolating multi-ionic  
543 electrolyte solution that hydrates (stabilizes) biomacromolecular surfaces and thus  
544 maintains their biochemical and 'architectural' functions (Harold, 2005). Such channels  
545 are theorized to have semi-conducting electrolytic properties, *i.e.* the capability to sort out  
546 and direct both inorganic ions and biochemical ions into different parts of the cell. These  
547 channels could be considered as transient 'microfluidic *electrolytic* integrated circuits',

548 ultimately ‘programmed’ by the nucleoid (genome). The semi-conductivity of these  
549 channels is based on the solution of a system of differential Poisson-Boltzmann equations  
550 applied to interacting planar anionic surfaces with an electrolyte in between them; under  
551 certain conditions – high negative potentials at a given temperature for a given set of  
552 charges, the electrolyte space between the surfaces becomes conductive only to cations,  
553 with anions being prevented to enter the space between the anionic surfaces (Spitzer,  
554 1984; Spitzer, 2003; Spitzer and Poolman, 2005). Phosphorylation reactions, which  
555 increase the negative potential within the channels, thus act as ‘switches’ that direct and  
556 sort out anions (according to their charge), *e.g.* ATP, ADP etc., toward more positive  
557 potential regions within the supercrowded clusters; at the same time, they change the  
558 morphology of the clusters by increased screened electrostatic repulsions (Spitzer, 1984;  
559 2003).

560 The crowding *in vivo* can significantly increase, up to ~50% volume fraction, in  
561 hyperosmotic media, when the cell loses water; protein sensors and transporters within the  
562 cell envelope then become activated and import osmolytes (potassium ions, glycine  
563 betaine, trehalose, etc.) in order to reduce the osmotic outflow of water into the nutrient  
564 medium (van den Bogaart *et al.*, 2007; Morbach & Krämer, 2002; Wood, 2011), and thus  
565 render plasmolysis less severe. Astonishingly, *Escherichia coli* cells can re-adjust and  
566 resume growing, albeit more slowly, under such extreme ‘supercrowded’ (hyperosmotic)  
567 conditions (Konopka *et al.* 2009), provided that the increase of crowding is performed in  
568 a step-wise sequential manner, and the cells have time to restructure its spatiotemporal  
569 architecture – to adapt to higher crowding conditions, when there is just about a  
570 monolayer of water of hydration around biomacromolecular surfaces (Cayley *et al.*,  
571 1991); however not all cells appear to survive in such experiments, reflecting the  
572 heterogeneous nature of bacterial (biological) populations.

573 The large concentration of cytoplasmic hydrated biomacromolecules has been  
574 theoretically treated as the repulsive excluded volume effect, which predicts increased  
575 stabilization of protein structures (Zhuo *et al.*, 2008) and increased tendency to form  
576 biomacromolecular complexes – various (hetero)multimers of proteins or proteins with  
577 nucleic acids; this effect has been investigated *in vitro* with polymeric ‘crowders’ (*e.g.*  
578 dextrans, polyethyleneglycols, etc.) as model polymers to simulate the crowding inside  
579 living cells. While this approach has been partly successful, it has now become apparent  
580 that *attractive* non-covalent forces between biomacromolecules need to be also  
581 considered: there is a ‘thin line’ between biochemically regulated clustering (gelling) and  
582 non-functional (fatal, irreversible) aggregation of proteins and nucleic acids (Pastore and  
583 Temussi, 2011; Jiao, *et al.*, 2010; Ellis & Minton, 2006; Miklos *et al.* 2010; Wang *et al.*,  
584 2011; Harding & Rowe, 2010; Schlesinger *et al.*, 2011; Boquist & Gröbner, 2007;  
585 Gierasch & Gershenson, 2009).

586

587

#### 588 **2.4. Self-regulating and re-emergent**

589

590 The above description of the physicochemical complexity of a bacterial cell – ionic  
591 and multicomponent, multiphase, and crowded, is made more complicated by the fact that  
592 during the cell cycle there are about 1000-2000 concurrent and sequential biochemical  
593 reactions within the cell and between the cell and the environment; these biochemical

594 reactions are rather well-synchronized and regulated to yield physiological processes,  
595 such as: (i) the sensing of the extracellular environment and the import of nutrients into  
596 the cell by the cell envelope, (ii) the conversion of the extracellular signals into  
597 cytoplasmic signals and their reception by the cytoplasmic side of the membrane and by  
598 the nucleoid (iii) biosynthesis of low molecular weight ‘building blocks’ including  
599 ‘fueling molecules’ such as ATP and GTP (iv) activation/deactivation of constitutive  
600 membrane proteins for immediate responses to environmental inputs, (iv) gene activation  
601 and silencing, and transcription, (iv) biosynthesis of ribosomes (v) translation via  
602 ribosomes, (vi) the initiation, control and termination of the enzymatic replication of the  
603 nucleoid and plasmids, and (vii) the cell division and other morphological movements  
604 (shrinkage, invagination, budding, adhesive gliding, sporulation, etc.)

605 There can be little doubt that coulombic (electrostatic) interactions and electrolytic  
606 semi-conduction play a major role in regulating such complex processes on a global  
607 cellular scale; this is so because ‘naked’ electrostatic forces (Coulomb’s law, eq. 1) are  
608 both very *strong and long-range* compared to *all* other non-covalent molecular forces.  
609

$$610 \quad F \propto \frac{q_1 q_2}{\epsilon r^2} \quad (1)$$

611  
612 Here, the force  $F$  is inversely proportional to the dielectric constant  $\epsilon$  of the solvent and to  
613 the square of the distance  $r$  separating the charges  $q_1$  and  $q_2$ . The cell *must* (and does)  
614 operate in an aqueous electrolyte of a relatively high ionic strength in order to shorten the  
615 range of naked coulombic forces (eq. 1), and thus make them *commensurate* with other  
616 non-covalent molecular forces (especially hydration) on the scale of a little below one  
617 nanometer (Spitzer & Poolman, 2009). The Debye-Hückel theory then modifies  
618 Coulomb’s law, eq. (1) approximately by the exponential term as  
619

$$620 \quad F \propto \frac{q_1 q_2}{\epsilon r^2} \exp(-\kappa r) \quad (2)$$

621  
622 Ionic strength is proportional to the square of the Debye constant  $\kappa$ , the inverse of which  
623  $1/\kappa$ , is a measure of the effective range of screened electrostatic interactions: the higher  
624 the ionic strength, the faster the screened electrostatic forces decay. The high dielectric  
625 constant  $\epsilon$  of water *reduces* the magnitude of electrostatic forces over any range of  
626 distances, be they ‘naked’ or screened (Phillips *et al.*, 2009; Spitzer & Poolman, 2009);  
627 the high dielectric constant of water and its unique temperature dependence thus selects  
628 water as the biological solvent – there are no other solvents with similar or higher  
629 dielectric constants so readily available, providing an environment ‘fit for life’  
630 (Henderson, 1913; Ball, 2008; Poolman & Spitzer, 2009). The commensuration of  
631 screened electrostatic forces, hydration and high biomacromolecular crowding suggests  
632 that the well-established 2-D membrane vectorial biochemistry is extended into 3-D  
633 vectorial biochemistry within the cytoplasm, particularly on the cytoplasmic side of the  
634 membrane (Spitzer, 2003; Poolman *et al.*, 2004; Spitzer & Poolman, 2005, 2009; Spitzer  
635 2011; Spitzer & Poolman, 2013).

636 It is not coincidental that when a bacterial cell is stressed (*e.g.* by starvation), the  
637 electrostatically highly charged molecules of (p)ppGpp are synthesized in order to ‘alarm

638 the cell ‘electrically’, ringing the doorbell so to speak, which initiates the *stringent*  
639 *survival response* on a global cellular scale; such response includes the re-switching of  
640 genetic circuits, progressive shutting-down of transcription and ribosome biosynthesis, the  
641 densification of the nucleoid, the shrinking of the cell volume, etc. (Neidhardt *et al.*, 1990;  
642 Potrykus and Cashel, 2008; Siegele & Kolter, 1992; Frenkiel-Krispin *et al.*, 2004).

643 Fundamentally, a bacterial cell, at any instant of its growth, can be viewed as a system  
644 of biochemically reacting carriers of electrical charge: charged proteins and nucleic acids  
645 dissolved and dispersed in an aqueous electrolytic solution, separated from the  
646 environment by a charged lipid bi-layer containing anionic lipids and ‘semi-conducting’  
647 protein transporters and channels (and a host of other proteins); localized biochemical  
648 reactions then ‘charge and discharge’ the membrane, which acts as a (‘leaky’) electrical  
649 *viscoelastic capacitor*, maintaining variable membrane potential and creating a multitude  
650 of chemiosmotic signals on the cytoplasmic side of the cell envelope (Mitchell, 1979).  
651 Some of these signals are then transmitted ‘tangentially’ along the cell envelope to control  
652 for example the motion of the flagellum, and some are transmitted to the nucleoid to  
653 regulate gene expression, and thereby cell’s growth, manifested by bio-electromechanical  
654 (morphological) movements of the cell (Morris & Jensen, 2008).

655 In order for such a complex system to work reasonably reproducibly during the cell  
656 cycle (as it does), biochemical reactions have to be localized within the cell and within the  
657 cell envelope. A relatively simple physicochemical mechanism to localize  
658 biomacromolecules is for them to become incorporated in 2-D ‘rafts’ within the cell  
659 envelope (Bray, 2005; López & Kolter, 2010) and in ‘supercrowded’ 3-D gels within the  
660 cytoplasm, as hypothesized by the sol-gel model (Spitzer & Poolman, 2013). In this  
661 model, ‘supercrowded’ biomacromolecular clusters (gels) are associated mainly with the  
662 cytoplasmic side of the cell envelope, and the nucleoid is situated in the middle, though  
663 many other spatiotemporal arrangements are possible; a similar interpretation was given  
664 to protein diffusion data in mitochondria (Partikian *et al.*, 1998).

665 The biomacromolecular gel formation (supercrowding), and the reverse process of gel  
666 liquefaction, are controlled by biochemical signaling reactions that increase or decrease  
667 hydrophobic and screened electrostatic attractive interactions (*i.e.* epigenetic  
668 modifications or ‘processing’ of nucleic acids and proteins during or after their  
669 biosynthesis); for example, methylations and dephosphorylations increase non-covalent  
670 attractions (gel formation) and the reverse reactions increase repulsions (gel liquefaction).  
671 Such regulated sol-gel transitions contribute to the morphological changes of the cell,  
672 along with the forces generated by the electrical charging and discharging of the lipid  
673 bilayer membrane (viscoelastic capacitor).

674  
675

### 676 **3. Experiments with ‘bacterial biotic soup’**

677

678 As the above descriptions show, any bacterial cell cycle is a very complicated process  
679 taking place under molecularly crowded conditions with myriads of physicochemical  
680 interactions. The molecular details of these interactions are currently being untangled by  
681 the approaches of system and synthetic biology – the ‘furry balls’ of interactomes,  
682 transcriptomes and other ‘-omes’, and the ‘dumpling soups’ of signaling pathways  
683 (Lewitzky *et al.*, 2012; Tompa & Rose, 2011), as well as by computational approaches

684 and modeling of the whole cell or its particular physiological functions (Elcock, 2010;  
685 Cossins *et al.*, 2011; Goldman *et al.*, 2009).

686 To cut through such formidable complications when considering the living cell *in toto*,  
687 I suggest an experimental approach – a short-cut in effect, to reconstructing ‘life’, *i.e.* a  
688 general, open-ended experimentation with ‘biotic soups’, *cf.* Introduction. The biotic soup  
689 experimentation would take place in two stages; first, the making of ‘biotic soups’, and  
690 second, subjecting them to cyclic gradients of temperature, water activity, radiation (UV,  
691 visible) etc., echoing the cyclic temperature gradients of the polymerase chain reaction  
692 (PCR). The cycling gradients also simulate Earth’s diurnal cycling as the primal force  
693 that brought about the historical emergence of cellular life and has contingently driven its  
694 evolution since (Rothchild, 2003, 2008; Spitzer & Poolman, 2009; Spitzer, 2013), as  
695 evidenced by the circadian clocks of many types of cells, including bacterial cells (Wijnen  
696 & Young, 2006). I thus argue for: (i) development of laboratory protocols to grow and  
697 disassemble bacterial cells (by physical means) from a ‘living’ state to a ‘dead’ state, and  
698 (ii) development of protocols to recover ‘living states’ from such disassembled bacterial  
699 parts, principally by cycling gradients of temperature, water activity, with a judicious  
700 ‘feeding’ of nutrients.

701 This approach requires expertise in growing, characterizing and manipulating living  
702 and dead bacterial populations, hence I discuss this topic only briefly in the form of  
703 questions, which bacteriologists and biotechnologists can address with the requisite  
704 knowledge in order to develop more detailed experimental designs.

705

### 706 **3.1. Making ‘biotic soup’**

707

708 Any bacterial population, possibly in a biofilm, can be lysed, yielding a lysate or a  
709 dead ‘biotic soup’ for further characterization and experimentation; the ‘biotic soup  
710 provides all the necessary chemicals more or less in the right proportions from which a  
711 ‘living state’ could arise, not necessarily in the form or growth habit of the original  
712 bacterial species. The following questions need be carefully considered:

- 713 (i) *Bacterial species*. Which bacterial populations (species, strains, metabolic life-styles,  
714 etc.) to select: ‘minimal’ gene and physical size, or a specific viable strain, L-  
715 forms (Leaver *et al.*, 2009; Diennes & Sharp, 1956), thermophiles, photon-  
716 dependent autotrophs? Non-oxygen respiring cyanobacteria may provide the most  
717 suitable model in relation to the origin of life questions, being able to grow  
718 without complex organic molecules, and being naturally transformable?
- 719 (ii) *Growth conditions*. Which nutritional medium to select or design? Making this  
720 choice is closely related to the above question; some minimal medium would be  
721 the most suitable from the standpoint of the origin of life research, though not  
722 necessarily from the point of finding the physicochemical ‘laws’ that describe the  
723 conditions of life’s emergence.
- 724 (iii) *The method of killing*. How to terminate a living bacterial population? How to lyse a  
725 bacterial population? A method needs be designed in which no ‘unnatural’  
726 chemicals, such as surfactants, solvents or enzymes are added; physical means are  
727 preferred, such as the lack of specific nutrients (starvation), a mild hypo-osmotic  
728 shock, various degrees of sonication, and different rates of freezing in a variety of



- 729 nutrient media of different water activities, slow evaporation of water, and any  
730 combination of such approaches.
- 731 (iv) *Timing of killing.* At which point in the growth curve to ‘kill’? Mid-point  
732 exponential, early on in the population growth with sufficient ‘food’ left over, or a  
733 stationary stage, or some particular state of nutritional or environmental stress?
- 734 (v) *Is the biotic soup dead?* What would be the assay for making sure that the biotic soup  
735 is ‘really dead’? (Davey, 2011). Not an easy experimental question, though  
736 current microbiological protocols would be a good starting point. [An aside:  
737 Would we conclude that a biotic soup was ‘primitively alive’, if a virus or phage  
738 were to multiply in it under cycling temperature conditions?]
- 739 (vi) *What would be the supramacromolecular composition of the biotic soup?* Most  
740 likely, there will be ribosomes, plasmids and nucleoids, all partly broken, with  
741 partly attached ‘broken’ cell envelopes (Tremblay *et al.*, 1969; Firshein, 1989;  
742 Zimmerman & Murphy, 2001); their kinds and concentrations will depend on the  
743 particular selections above.
- 744

745 The composition of biotic soups is clearly very complex and new characterization  
746 methods will need be developed, for example ‘gentle’ centrifugal fractionation to obtain  
747 new kinds of ‘less complex’ fractions. Because extant bacterial populations are  
748 biochemically robust with redundant systems to survive, some simplification of biotic  
749 soups may be possible and in fact desirable in order to better understand the essential  
750 principles of ‘recoverable’ living states.

751

### 752 **3.2. ‘Putting Humpty-Dumpty together again’**

753

754 According to the notion that Earth’s diurnal cycles, yielding a multitude of cyclic  
755 physicochemical gradients, were in effect the ‘designers’ of living systems, such gradients  
756 may also perform ‘repeat’ experiments with (simplified) biotic soups in continuous  
757 (evolutionary) attempts to re-construct some form of a living system. Thus, in the  
758 temperature upswings the structures will tend to diminish (dissolve and/or dissociate  
759 more, though not necessarily), and in the temperature downswing, they might re-appear,  
760 perhaps in a different manifestation (structural details), given the supramacromolecular  
761 nature of the system. Also, the cycling temperature regime provides energy when the  
762 temperature goes up; this mechanism speeds up chemical reactions, and also plays a role  
763 in coupling signaling reactions and sol-gel phase transitions.

764 Thus cyclic temperature gradients both *shape* supramacromolecular colloidal  
765 structures needed for ‘life’ (through non-covalent attractive and repulsive interactions  
766 inherent in biomacromolecular crowding) and *drive* some biochemical reactions more  
767 than others; in other words, the stoked biotic soup may ‘live’ when the temperature goes  
768 up, and become dormant or dead when the temperature goes down. This model could  
769 represent Darwin’s primitive ‘semi-life’, dependent directly on external ‘heat stoking’  
770 metabolism, though such a semi-life may not be readily recognizable by current  
771 biochemical assays.

772 As with the preparation of the biotic soup, there are a number of questions to consider  
773 regarding the ‘stoking’ regimes:

- 774 (i) What would be the starting volume fraction of all biomolecules and  
775 biomacromolecules? We could start with a very dilute system as in *in vitro*  
776 biochemistry or with a very crowded (*in vivo* range of crowdedness) or even with a  
777 supercrowded system; this will depend on the lysing methods and other assay  
778 methods. Thus the ‘biotic soup’ could be stoked in an open evaporating system in  
779 order to bring it to the *emergent crowding transition* (Spitzer and Poolman, 2009), or  
780 it could be stoked supercrowded at, say, a 70% volume fraction while judiciously  
781 adding water and nutrients (Spitzer & Poolman, 2013); alternatively, if the final  
782 system is in the range of *in vivo* volume fractions (20 -50%), then a closed system  
783 with constant volume fraction might be in order.
- 784 (ii) How to design the reactor as an ‘evolving chemostat’? How to synchronize feeding  
785 regimes of nutrients with cooling/heating cycles? How to determine biochemical  
786 conversions (the ‘growth of the biotic soup’) and ‘define’ operationally a living state?
- 787 (iii) How would the final ‘structure’ of such a biotic soup (in the 30 -50% range of  
788 volume fractions) depend on the frequency and amplitude of the temperature cycles?  
789 Again, these choices will have to be made in the light of the biochemical suitability  
790 of bacterial species to withstand large temperature changes without denaturing the  
791 functional conformations of key biomacromolecules; hyperthermophiles may be a  
792 suitable choice here.
- 793 (iv) How could we detect the formation of transient supramacromolecular structures, and  
794 membranes with integral proteins, and their biochemical activity?
- 795 (v) How could we monitor the structural state of the chromosome, and its replicating  
796 activity?
- 797 (vi) What effects could be observed by increasing the ATP/ADP ratio? It is hypothesized  
798 that increasing the ATP/ADP ratio could ‘jump-start’ transient reaction loops, when  
799 the biotic soup reaches the ‘emergent’ level of biomacromolecular crowding; when to  
800 start ‘feeding’ the emerging living state?
- 801 (vii) What would be the criteria to distinguish between the living, comatose, sick or  
802 injured, dormant, viable but non-culturable, and dead?

803

804 Any emergent living state may not readily materialize in the classical prokaryotic  
805 physical forms (cocci, rod etc.) because the formation of a *closed cell envelope with a*  
806 *lipid bilayer membrane* is expected to be the most challenging phenomenon to bring about  
807 and manipulate by cycling physicochemical gradients: most likely, the cycling  
808 experiments need to be done in the ‘supercrowded’ regime (Spitzer, 2011; Spitzer &  
809 Poolman, 2013), when ‘super-cells’ (with imperfect internal compartments and multiple  
810 chromosomes, in effect ‘proto-biofilms’) will initially start assembling and disassembling.  
811 Such unstable pre-Darwinian ‘barely living states’ may be identified as progenetic, *i.e.*  
812 without established heredity and organismal lineages – with rampant horizontal gene  
813 transfer – but with a stable (no longer evolving) genetic code (Woese & Fox, 1977; Fox  
814 2011; Fox *et al.*, 2012).

815

#### 816 **4. Bacterial cells as evolving chemical micro-reactors**

817

818 The model of a sol-gel, battery-like workings of a cell as a ‘*viscoelastic capacitor*’ is  
819 consistent with a more general thermodynamic view of a growing cell as an open

820 thermodynamic system that exchanges energy and materials with the surroundings in  
821 accordance with the laws of chemistry and physics (Hinshelwood, 1946; von Bertalanffy,  
822 1950; Qian, 2006). In practice, such open non-equilibrium thermodynamic systems are  
823 industrial chemical reactors, and it is therefore useful to compare the operation and  
824 regulation of a chemical reactor with that of a bacterial cell. This comparison has its  
825 limitations, just as comparing a cell to the hardware and software of a computer can be  
826 stretched only so far; still, such comparisons do illuminate the workings of a cell as a  
827 complex self-programmed chemical engineering process, which, as any such process, is  
828 prone to stochastic and contingent errors, malfunction and even catastrophic upsets.

829

#### 830 **4.1. Ideal bacterial cell**

831

832 Admittedly, a bacterial cell is a very peculiar chemical micro-reactor; compared to an  
833 industrial chemical reactor; there are two obvious differences: (i) the walls of a chemical  
834 reactor have fixed shape and stay constant and are not part of the chemical production as  
835 compared to the cell envelope (however they are ‘permeable’ as raw materials go in and  
836 the product gets out in a regulated and prescribed manner), and (ii) the solid-state  
837 computer with an appropriate program that regulates and controls the reactor resides  
838 outside and is not part of the production either, as compared to the ‘nucleoid program’  
839 that is inside the cell. In both cases there are many sensors and regulators that monitor and  
840 control the process inside and outside.

841 The operation and regulation of this unusual chemical micro-reactor can be elaborated  
842 with the help of an ‘ideal biological cell’, similar to the concept of ideal solution of  
843 physical chemistry. The ideal biological cell has two characteristics: a) its operation and  
844 regulation (growth and division) are without errors, and b) its environment is ‘infinite’  
845 and unchanging. Under such ideal conditions, only ‘mathematically’ exact, non-evolving  
846 copies of the ‘mother cell’ will be produced; in other words, the ideal bacterial cell does  
847 not evolve. In the real world, there are cell-cycle process errors that arise from various  
848 sources, particularly from unexpectedly variable environments (composition, temperature,  
849 irradiation, etc.) and from direct interactions (contact) with other cells.

850

#### 851 **4.2. The process errors of the cell cycle**

852

853 When the process errors in the cell cycle are *negligibly small*, one cellular micro-  
854 reactor will give rise to two copies with vanishingly small differences – only *ideal*  
855 *biological* cells are then produced, and the micro-reactor will not have effectively  
856 evolved. In chemical engineering language, the production is within the product’s  
857 specifications, for example the level of unreacted starting materials (and other impurities)  
858 is acceptably small.

859 Larger process errors (but non-fatal) make the difference between the two copies quite  
860 apparent – the bacterial micro-reactor will have evolved, yielding one or both new cells  
861 somewhat dissimilar to the original cell; in chemical engineering language the product is  
862 out of specification – it is a different product, which could have better or worse  
863 characteristics compared to the original (but in any case it cannot be sold in normal  
864 manner!); in bacteriological language, this means that the cellular DNA has changed,  
865 producing different strains or phenotypes – the essence of biological evolution (*cf.*

866 Griffith's experiment with *Streptococcus pneumonia*, indicating a large scale DNA  
867 change by natural transformation; or a single nucleotide mutation, A→T in the  
868 GAG→GTG codon incorporating glutamic acid instead of valine in the sickle cell  
869 hemoglobin).

870 Very large errors bring about catastrophic failures – the death of bacterial cells; in  
871 chemical engineering language, the reactor becomes non-operational (may even cause an  
872 industrial accident), as it was not designed to cope with such unexpected (erroneous)  
873 inputs. Such 'fatal' errors may come from large and sudden changes in the environment  
874 when the process control computer's capability becomes compromised – or in Darwinian  
875 language, the genome's performance has not yet reached the required evolutionary stage  
876 to successfully cope with new conditions, *i.e.* to ensure its own survival; the bacterial  
877 'species' may then die out if new environmental conditions prevail for too long. It is not  
878 inconceivable that large errors may, albeit very rarely, bring about significantly different  
879 but still functioning (perhaps poorly) cellular micro-reactors that can 'dynamically  
880 re-stabilize' and evolve into new kinds of cells, *e.g.* by 'fusion' of simple cells,  
881 incorporating internal lipid surfaces and multiple chromosomes. Eukaryotic cells did  
882 likely arise this way (Sagan, 1967); their multicellular assemblies are now 'hi-tech'  
883 (highly evolved) engineering designs of 'wheels-within-wheels', based on the unit  
884 bacterial cell design from a long time ago.

885 Darwinian evolution then appears naturally as a consequence of non-ideal cellular  
886 reproduction – an 'engineering realization' of an open, non-equilibrium (non-linear)  
887 thermodynamic process, the results of which, for a given genome, are contingent upon  
888 physicochemical and biological characteristics of the environment.  
889

### 890 **4.3. Is Darwinian evolution directional toward increasing complexity?**

891  
892 There is little doubt that over the last 3.5 billion years, biological evolution has  
893 progressed toward more and more complex cells and multicellular organisms – toward  
894 greater complexity, or Darwin's 'endless forms most beautiful', as if by intentional  
895 design. The chemical engineering comparison between the error-prone bacterial cell  
896 cycle and error-prone chemical manufacturing processes explains qualitatively the  
897 apparently intentional direction of evolution. Over the last 3.5 billion years there were  
898 many more 'fatal' cell cycle errors (there were no 'intelligent' chemical engineers) that  
899 led to the extinction of many cells and organisms; only a small fraction of minor non-fatal  
900 errors (and very, very few *major* non-fatal errors) led to an 'improved' physicochemical  
901 performance of the cell, or to new kinds of cells; such 'improvements' allowed greater  
902 chances of maintaining cells' chemical and physical identity (survival) over an increasing  
903 range of extreme environmental gradients (or 'insults' in biological language); the  
904 cytoplasmic homeostasis has evolved in this way– the maintenance and regulated  
905 restructuring of the cytoplasm during variable rates of growth under changing  
906 environmental conditions.

907 Darwinian evolution is thus an *inevitable* result of physicochemical processes, and the  
908 direction toward the complex and the sophisticated is *natural*, together with the 'less  
909 appealing' corollary – the dying-out of less evolvable (physicochemically) cells and  
910 organisms, or them ending up as 'living fossils' evolutionarily stuck in particular  
911 environmental niches. The longer the evolutionary time of 'fit-for-life' environments

912 (Henderson, 1913) – now at 3.5 billion years and ticking, the greater the chances of ‘still  
913 better’ multicellular systems keeping on evolving.

914

#### 915 **4.4. The future of *Homo sapiens*’s evolution**

916

917 With the advent of synthetic biology, however, the contingent unintentional  
918 Darwinian evolution will cease in the next 1000 years, as *intentionally* designed genetic  
919 improvements will become the accelerating evolutionary mechanism for *Homo sapiens*  
920 (Church and Regis, 2012). More research is needed on how the brain works as a highly  
921 evolved ‘computer *wetware*’, as well as the neuronal connections between the brain and  
922 the sensory organs that monitor and respond to the environment. ‘Watson’, the *hardware*  
923 solid-state computer, did great playing *Jeopardy* – but will ‘he (or she or it)’ think of  
924 something tomorrow? (Bray, 2009; 2012)

925 Other dramatic variations on the ‘wet’ version of the ‘Watson’ theme are likely to  
926 materialize soon, and are in fact currently in progress. For example, the original robots  
927 (superficially unrecognizable from humans), their body parts being made in ‘cooking’  
928 vats in the play R.U.R. (*Rossum’s Universal Robots*), are beginning to be synthesized: *cf.*  
929 advances in research on human embryonic stem cell (Yirme et al., 2008); another non-  
930 Darwinian evolutionary track is being made possible via *Robocops* and similar ‘cyborg’  
931 manifestations: *cf.* current progress in ‘electrical’ interfacing of the brain of the disabled  
932 with new mechanical (solid-state) robotic arms. (Hochberg et al. 2012).

933

934

## 935 **5. Conclusions and perspectives**

936

937 Biochemical biotic soups represent realistic (and inexpensive) experimental systems  
938 to study the cycling (non-linear, non-equilibrium) biological complexity and the origin of  
939 living states through the action of cycling physicochemical gradients. Even though this  
940 approach resembles Fred Hoyle’s parable of a rotating tornado trying to assemble a  
941 Boeing aircraft from its junked parts (a non-chemical non-sequitur in any case), the  
942 experimental goal of assembling a living state from *actual* (not necessarily synthetic)  
943 bacterial parts seems worthwhile: to learn how to transit from ‘dead’ to ‘being alive and  
944 reproducing’ and *vice versa*. The advantage of the biotic soup as a complex experimental  
945 system is that it is ‘close’ to real living systems in its chemical composition. There is a  
946 great number of possible designs of ‘biotic soup’ experiments; a combined  
947 bacteriological, biochemical, biophysical and biotechnological expertise is needed –  
948 particularly in practical aspects of ‘closed membrane, battery-like’ bioenergetics  
949 (chemiosmotics) and its interactions with the genetics of the nucleoids, plasmids and  
950 phages.

951 The biotic soup experimentation will motivate the development of new protocols to a)  
952 terminate bacterial life to ‘different degrees’, b) to clearly understand the molecular and  
953 physicochemical causes of bacterial ‘death’, and c) to identify systems in which ‘living  
954 states’ could be detected under cycling non-equilibrium conditions. In principle, we  
955 could discover how to ‘stoke’ a multicomponent, multiphase and crowded biochemical  
956 system into a dynamic semi-biological existence, perhaps in the form of (fast evolving)  
957 progenotes.

958

959

## 960 ACKNOWLEDGEMENTS

961

962 I thank: Bert Poolman for discussions and collaboration on the structuring of bacterial cells via  
963 physicochemical forces, particularly of ionic nature; Elio Schaechter for interest and advising on  
964 the relationships between the growth rates of bacteria and their physical (morphological)  
965 appearance, and for his help with my blog contribution at  
966 <http://schaechter.asmblog.org/schaechter/2013/03/feynman-said-just-look-at-the-thing-.html>;  
967 Dave Deamer for help with the prebiotic aspects of emergent cells and for introducing me to the  
968 extensive prebiotic literature; Meir Lahav for his comments on the concept of the cyclic  
969 coevolution of biological chirality with the excess of potassium ions in the cytoplasm (Spitzer,  
970 2013); and Gary Pielak and Allen Minton for discussions on biomacromolecular crowding *in vivo*.  
971 Wendy Spitzer and Gary Pielak are thanked for help with the manuscript, and MCP Inc. is  
972 thanked for support.

973

974

## 975 REFERENCES

976

- 977 1. Adami C, Ofria C and Collier TC (2000) Evolution of biological complexity. PNAS  
978 97:4463-4468
- 979 2. Alberts B, Johnson A, Lewis J, Raff M, Roberts K, and Walter P (2002) Molecular  
980 Biology of the Cell. Garland Science, N.Y.
- 981 3. Allwood AC, Walter MR, Burch IW, Kamber BS (2007) 3.43 billion-year-old stromatolite  
982 reef from the Pilbara Craton of Western Australia: ecosystem-scale insights to early life on  
983 Earth. Precambrian Research 158:198–227
- 984 4. Bada JL and Lazcano A (2003) Prebiotic soup: revisiting the Miller experiment. Science  
985 300:745-746
- 986 5. Bakshi S, Siryaporn A, Goulian M and Weisshaar JC (2012) Superresolution imaging of  
987 ribosomes and RNA polymerase in live Escherichia coli cells. Mol. Microbiol. 85:21–38
- 988 6. Ball, P (2008) Water as an active constituent in cell biology. Chem. Rev. 108:74-108.
- 989 7. Bassler BL (2010) Small cells – big future. Molecular Biology of the Cell 21:3786-3787
- 990 8. Bayer ME and Sloyer JL (1990) The electrophoretic mobility of Gram-negative and Gram-  
991 positive bacteria: an electrokinetic analysis. J. Gen. Microbiol. 136:867-874
- 992 9. Benner SA (2010) Defining life. Astrobiology 10:10210-1030
- 993 10. Benner SA and Sismour AM (2005) Synthetic biology. Nature Rev Genet 6:533-543
- 994 11. Bernal JD (1967) The Origin of Life. World Publishing Co, Cleveland OH
- 995 12. Bertalanffy, von L (1950) The theory of open systems in physics and biology. Science  
996 111:23-29
- 997 13. Boquist, M and Gröbner G (2007) Misfolding of amyloidogenic proteins at membrane  
998 surfaces: the impact of macromolecular crowding. J. Am. Chem. Soc. 129:14848:14849
- 999 14. Bray D (2005) Flexible peptides and cytoplasmic gels. Genome Biology, Vol. 6,  
1000 Article106

- 1001 15. Bray D (2009) *Wetware: a Computer in Every Living Cell*. Yale University Press, New  
1002 Haven, CT
- 1003 16. Bray D (2012) *Brain versus Machine*. In *Singularity Hypotheses: A Scientific and*  
1004 *Philosophical Assessment (The Frontiers Collection)* Eden AH, Moor JH, Søraker JH, &  
1005 Steinhart E, eds.) Springer-Verlag, London
- 1006 17. Cayley SB, Lewis A, Guttman HJ, Record Jr. MT (1991) Characterization of the cytoplasm  
1007 of *Escherichia coli* K-12 as a function of external osmolarity. Implications for protein-  
1008 DNA interactions *in vivo*. *J. Mol. Biol.* 222:281-300
- 1009 18. Charras TG, Coughlin M, Mitchison TJ, and Mahadavan L (2008) Life and times of a  
1010 cellular bleb. *Biophysical J.* 94:1836-1853
- 1011 19. Church G and Regis E (2012) *Regenesi*s. Basic Books, New York
- 1012 20. Cossins BP, Jacobson MP and Guallar V (2011) A new view of the bacterial cytosol  
1013 environment. *PLoS Comput Biol* 7(6): e1002066 doi:10.1371/journal.pcbi.1002066
- 1014 21. Csete ME and Doyle JC (2002) Reverse engineering of biological complexity. *Science*  
1015 295:1664-19669.
- 1016 22. Danchin A (2009) Bacteria as computers making computers. *FEMS Microbiology Reviews*  
1017 33: 3–26
- 1018 23. Davey HM (2011) Life, death and in-between: meanings and methods in microbiology.  
1019 *Appl. Environ. Microbiol.* 77:5571-5576
- 1020 24. Deamer D (2011) *The First Life*. University of California Press, Berkeley and Los  
1021 Angeles, CA
- 1022 25. de Kerchove AJ and Elimelech M (2005) *Langmuir* 21:6462-6472
- 1023 26. Diennes L and Sharp JT (1956) The role of high electrolyte concentration in the production  
1024 and growth of L forms of bacteria. *J. Bacteriol.* 71:208-213
- 1025 27. Eisenberg D (2003) The discovery of  $\alpha$ -helix and  $\beta$ -sheet, the principal structural features  
1026 of proteins. *PNAS* 100:11207-11210
- 1027 28. Elcock AH (2010) Models of macromolecular crowding effects and the need for  
1028 quantitative comparisons with experiment. *Curr. Opin. Struct. Biol.* 20:1-11
- 1029 29. Ellis RJ (2001) Macromolecular crowding: obvious but underappreciated. *Trends in*  
1030 *Biochem. Sci.* 26:597:604
- 1031 30. Ellis RJ and Minton AP (2006) Protein aggregation in crowded environments. *Biol. Chem.*  
1032 387:485:497
- 1033 31. Elowitz M and Lim WA (2010) Build life to understand it. *Nature* 468: 889-890
- 1034 32. Fels J, Orlov SN, Grygorczyk R (2009) The hydrogel nature of mammalian cytoplasm  
1035 contributes to osmosensing and extracellular pH sensing. *Biophys. J.* 96:4276-4285
- 1036 33. Fenn EE, Wong DB, and Fayer MD (2009) Water dynamics at neutral and ionic interfaces.  
1037 *PNAS* 106: 15243-15248
- 1038 34. Firshein W (1989) Role of the DNA/membrane complex in prokaryotic DNA replication.  
1039 *Annual Review of Microbiology* 43: 89-120
- 1040 35. Frenkiel-Krispin D, Ben-Avraham I, Englander J, Shimoni E, Wolf SG, and Minsky A  
1041 (2004) Nucleoid restructuring in stationary-state bacteria. *Mol. Microbiol.* 51:395-405.

- 1042 36. Fry I (2000) *The Emergence of Life on Earth*. Rutgers University Press, New Brunswick  
1043 NJ
- 1044 37. Fu G, Huang T, Buss J, Coltharp C, Hensel Z and Xiao J (2010) *In vivo* structure of the E.  
1045 coli FtsZ-ring revealed by photoactivated localization microscopy (PALM). *PLoS One* 5  
1046 (9), e12682
- 1047 38. Gibson DG *et al.* (2010) Creation of a bacterial cell controlled by a chemically synthesized  
1048 genome. *Science* 329:52-56
- 1049 39. Gierasch LM and Gershenson A (2009) Post-reductionist protein science or putting  
1050 Humpty Dumpty back together again. *Nature Chem. Biol.* 5:774 - 777
- 1051 40. Gilmore I and Sephton MA (eds) (2004) *An Introduction to Astrobiology*. Cambridge  
1052 University Press, Cambridge UK
- 1053 41. Goldenfeld N and Kadanoff LP (1999) Simple lessons from complexity. *Science* 284:87-  
1054 89
- 1055 42. Goldman JP, Levin MD and Bray D (2009) Signal amplification in a lattice of coupled  
1056 protein kinases. *Mol. BioSyst.* 5:1853-1859
- 1057 43. Goodsell DS (2010) *The Machinery of Life*. Springer Science + Business Media, New  
1058 York.
- 1059 44. Gould SJ (1989) *Wonderful Life: The Burgess Shale and the Nature of History*. W.W.  
1060 Norton & Company, New York
- 1061 45. Greenfield D, McEvoy AL, Shroff H, Crooks GE, Wingreen NS, Betzig E and Liphardt J  
1062 (2009) Self-Organization of the Escherichia coli chemotaxis network imaged with super-  
1063 resolution light microscopy. *PLoS Biol* 7(6): e1000137. doi:10.1371/journal.pbio.1000137
- 1064 46. Halford, SE (2009) An end to 40 years of mistakes in DNA-protein association kinetics?  
1065 *Biochem. Soc. Trans.* 37:343-348
- 1066 47. Halle B (2004) Protein hydration dynamics in solution: a critical survey. *Philos. Trans. R.*  
1067 *Soc. Lond. B Biol. Sci.* 359:1207-23
- 1068 48. Harding SE and Rowe AJ. (2010) Insight into protein-protein interactions from analytical  
1069 ultracentrifugation. *Biochem. Soc. Trans.* 38:901-7
- 1070 49. Harold FM (2005) Molecules into cells: specifying spatial architecture. *Microbiol. Mol.*  
1071 *Biol. Rev.* 69:544-564
- 1072 50. Hartwell LH, Hopfield JJ, Leibler S and Murray AW (1999). From molecular to modular  
1073 cell biology. *Nature* 402:C47-C52
- 1074 51. Hazen RM (2005) *Genesis: the Scientific Quest for Life's Origins*. Joseph Henry Press,  
1075 Washington DC
- 1076 52. Henderson LJ (1913) *The Fitness of the Environment*. MacMillan, N.Y.
- 1077 53. Higgins CF, Cairney J, Stirling DA, Sutherland L and Booth IR (1987) Osmotic regulation  
1078 of gene expression: ionic strength as an intracellular signal? *Trends in Biochemical*  
1079 *Sciences* 12:339-344
- 1080 54. Hinshelwood C (1946) *Chemical Kinetics of the Bacterial Cell*. Oxford University Press,  
1081 London UK



- 1082 55. Hochberg LR, Bacher D, Jarosiewicz B, Masse NY, Simeral JD, Vogel J, Haddadin S, Liu  
1083 J, Cash SS, van der Smagt P, Donoghue JP (2012) Reach and grasp by people with  
1084 tetraplegia using a neurally controlled robotic arm. *Nature* 485:372-5
- 1085 56. Jasnin M (2009) Atomic-scale dynamics inside living cells explored by neutron. *J. R. Soc.*  
1086 *Interface* 6:S611-S617
- 1087 57. Jiao M, Li H-T, Chen J, Minton AP, Liang Y (2010). Attractive protein-polymer  
1088 interactions markedly alter the effect of macromolecular crowding on protein association  
1089 equilibria. *Biophysical J.* 99:914-923
- 1090 58. Kayitmazer AB, Bohidar HB, Mattison KW, Bose A, Sarkar J, Hashidzume A, Russo PS,  
1091 Jaegerf W and Dubin PL (2007). Mesophase separation and probe dynamics in protein–  
1092 polyelectrolyte coacervates. *Soft Matter* 3:1064-1076
- 1093 59. Kell DB, Ryder HM, Kaprelyants AS and Westerhoff HV (1991) Quantifying  
1094 heterogeneity: flow cytometry of bacterial cultures. *Antonie van Leeuwenhoek* 60:145-158
- 1095 60. Kim BH and Gadd GM (2008) *Bacterial Physiology and Metabolism*. Cambridge  
1096 University Press, Cambridge
- 1097 61. Kiraga J, Mackiewicz P, Mackiewicz D, Kowalczyk M, Biecek P, Polak, N, Smolarczyk  
1098 K, Dudek MR and Cebrat S (2007) The relationship between the isoelectric point and  
1099 length of proteins, taxonomy and ecology of organisms. *BMC Genomics* 8:163  
1100 doi:10.1186/1471-2164-8-163
- 1101 62. Konopka MC, Sochacki KA, Bratton BP, Shkel IA, Record MT, Weisshaar JC (2009)  
1102 Cytoplasmic protein mobility in osmotically stressed *Escherichia coli*. *J Bacteriol.*  
1103 191:321-237
- 1104 63. Koppelman, C-M, den Blaauwen T, Duursma MC, Heeren RMN, and Nanninga N (2001)  
1105 *Escherichia coli* minicell membranes are enriched in cardiolipin. *J. Bacteriol.* 183:6144-  
1106 6147
- 1107 64. Krakauer CD, Collins JP, Erwin D, Flack JC, Fontana W, Laubichler MD, Prohaska SJ,  
1108 West GB and Stadler PF (2011) The challenges and scope of theoretical biology. *J.*  
1109 *Theoret. Biol.* 276: 269-276
- 1110 65. Kwok R (2010) Five hard truths for synthetic biology. *Nature* 463:288-290
- 1111 66. Lahav N (1999) *Biogenesis: Theories of Life's Origin*. Oxford University Press, Oxford
- 1112 67. Leaver M, Domínguez-Cuevas P, Coxhead JM, Daniel RA, Errington J (2009) Life  
1113 without a wall or division machine in *Bacillus subtilis*. *Nature* 457:849-853
- 1114 68. Lewitzky M, Simister P and Feller SM (2012) Beyond ‘furballs’ and ‘dumpling soups’ –  
1115 towards a molecular architecture of signaling complexes and networks. *FEBS Letts.*  
1116 <http://dx.doi.org/10.1016/j.febslet.2012.04.029>
- 1117 69. Loeb J (1906) *The Dynamics of Living Matter*. The Columbia University Press, New York
- 1118 70. Loeb J (1899) On the nature of the process of fertilization and the artificial production of  
1119 normal larvae (Plutei) from the unfertilized eggs of the sea urchin. *American Journal of*  
1120 *Physiology* 3: 135-138
- 1121 71. López D and Kolter R (2010) Functional microdomains in bacterial membranes. *Genes &*  
1122 *Dev.* 24:1893-1902
- 1123 72. Losick R and Desplan C (2008) Stochasticity and Cell Fate. *Science* 320:65-68

- 1124 73. Luisi PG (2006) *The Emergence of Life: From Chemical Origins to Synthetic Biology*.  
1125 Cambridge University Press, Cambridge
- 1126 74. Lutkenhaus J, Pichoff S, Du S (2012) Bacterial cytokinesis: From Z ring to divisome.  
1127 *Cytoskeleton (Hoboken)* 69:778-90
- 1128 75. Mann S (2012) System of creation: the emergence of life from nonliving matter. *Accts.*  
1129 *Chem. Res.* 45:2131-41
- 1130 76. Mathews CK (1993) The cell – a bag of enzymes or a network of channels? *J. Bacteriol.*  
1131 175:6377-6381
- 1132 77. Mayr E (1996) The autonomy of biology: the position of biology among the sciences. *Q.*  
1133 *Rev. Biol.* 71:97-106
- 1134 78. Mayr E (2007) *What Makes Biology Unique? Considerations on the Autonomy of a*  
1135 *Scientific Discipline*. Cambridge University Press, Cambridge
- 1136 79. Mazzocchi F (2008) Complexity in biology. *EMBO reports* 9:10-14
- 1137 80. Mika JT, van der Bogaart G, Veenhof L, Krasnikov V and Poolman B (2010) Molecular  
1138 sieving properties of the cytoplasm of *Escherichia coli* and consequences of osmotic stress.  
1139 *Mol. Microbiol.* 77: 200-207
- 1140 81. Miklos AC, Li C, Sharaf NG, Pielak GJ (2010) Volume exclusion and soft interaction  
1141 effects on protein stability under crowded conditions. *Biochemistry* 49:6984-91
- 1142 82. Miller SL (1953) A production of amino acids under possible primitive Earth conditions.  
1143 *Science* 117:528-529
- 1144 83. Mitchell P (1979) Compartmentation and communication in living systems. Ligand  
1145 conduction: a general catalytic principle in chemical, osmotic, and chemiosmotic reaction  
1146 systems. *Eur. J. Biochem.* 95:1-20
- 1147 84. Morbach S and Krämer R (2002) Body shaping under water stress: osmosensing and  
1148 osmoregulation of solute transport in bacteria. *Chembiochem.* 3, 384-397
- 1149 85. Morris DM and Jensen GJ (2008) Toward a biomechanical understanding of whole  
1150 bacterial cells. *Annu. Rev. Biochem.* 77:583-613
- 1151 86. Nandagopal N and Elowitz MB (2011) Synthetic biology: bntegrated gene circuits. *Science*  
1152 333:1244-1248
- 1153 87. Neidhardt FC, Ingraham JL and Schaechter M (1990) *Physiology of the Bacterial Cell: A*  
1154 *Molecular Approach*. Sinauer Associates Inc., Sunderland, MA
- 1155 88. Noireaux V, Maeda YT, Libchaber A (2011) Development of an artificial cell, from self-  
1156 organization to computation and self-reproduction. *PNAS* 108:3473-3480
- 1157 89. Norris V, den Blaauwen T, Cabin-Flaman A, Doi RH, Harshey R, Janniere L, Jimenez-  
1158 Sanchez A, Jin DJ, Levin PA, Mileykovskaya E, Minsky A, Saier Jr M, Skarstad K (2007)  
1159 Functional taxonomy of bacterial hyperstructures. *Microbiol. Mol. Biol. Rev.* 71:230-253.
- 1160 90. Oparin, AI (1924) *The Origin of Life*. Worker Publisher, Moscow
- 1161 91. Ovadi J and Srere PA (1999) Macromolecular compartmentation and channeling.  
1162 *International Review of Cytology* 192:255-280
- 1163 92. Pace NR, Sapp J, and Nigel Goldenfeld N (2012) Phylogeny and beyond: scientific,  
1164 historical, and conceptual significance of the first tree of life. *PNAS* 109:1011-1018

- 1165 93. Pastore A and Temussi PA (2011) The two-faces of Janus: functional interactions and  
1166 protein aggregation. *Curr Opin Struct Biol* 22:1-8
- 1167 94. Pauling L, Corey RB and Branson HR (1951) The structure of proteins: two hydrogen-  
1168 bonded helical configurations of the polypeptide chain. *PNAS* 37:205-211
- 1169 95. Pauly PJ (1987) *Controlling Life: Jacques Loeb & the Engineering Ideal in Biology*.  
1170 Oxford University Press, USA.
- 1171 96. Persson E and Halle B (2008) Cell water dynamics on multiple time scales. *PNAS*  
1172 105:6266-6271
- 1173 97. Phillips R, Kondev J and Theriot J (2009) *Physical Biology of the Cell*. Garland Science,  
1174 Taylor & Francis group LLC
- 1175 98. Poolman B, Spitzer JJ and Wood JM (2004) Bacterial osmosensing: roles of membrane  
1176 structure and electrostatics in lipid-protein and protein-protein interactions. *Biophys.*  
1177 *Biochim. Acta* 1666:88-104.
- 1178 99. Potrykus K and Cashel M (2008) (p)ppGpp: still magical? *Annu. Rev. Microbiol.* 62:35-51
- 1179 100. Pross A and Pascal R (2013) The origin of life: what we know, what we can know and  
1180 what we will never know. *Open Biol* 3: 120190; <http://dx.doi.org/10.1098/rsob.120190>
- 1181 101. Pross A (2011) Toward a general theory of evolution: extending Darwinian theory to  
1182 inanimate matter. *Journal of Systems Chemistry* 2:1
- 1183 102. Purnick PE and Weiss R (2009) The second wave of synthetic biology: from modules to  
1184 systems. *Nature Reviews Molecular Cell Biology* 10: 410-422
- 1185 103. Qian H (2006) Open-system nonequilibrium steady state: statistical thermodynamics,  
1186 fluctuations, and chemical oscillations. *J. Phys. Chem. B* 110:15063-15074
- 1187 104. Rasmussen S, Bedau MA, Chen L, Deamer D, Krakauer DC, Packard NH, Stadler PF  
1188 (eds) (2008) *Protocells: Bridging Nonliving and Living Matter*. The MIT Press, Cambridge  
1189 MA
- 1190 105. Rice AL (1983) Thomas Henry Huxley and the strange case of *Bathybius haeckelii*; a  
1191 possible alternative explanation. *Archives of Natural History* 11:169-180
- 1192 106. Romantsov T, Stalker L, Culham DE, and Wood JM (2008) Cardiolipin controls the  
1193 osmotic stress response and the subcellular location of transporter ProP in *Escherichia coli*.  
1194 *J. Biol. Chem.* 283:12314-12323
- 1195 107. Rothschild LJ (2003) *The Sun: The Impetus of Life in Evolution on Planet Earth: The*  
1196 *Impact of the Physical Environment*, L. Rothschild and A. Lister, eds. Academic Press,  
1197 London, pp. 87-107
- 1198 108. Rothschild LJ (2008) A powerful toolkit for synthetic biology: Over 3.8 billion years of  
1199 evolution. *Bioessays* 32:304-313
- 1200 109. Sagan L (1967) On the origin of mitosing cells. *J. Theor. Biol.* 14:255-74
- 1201 110. Schaechter M, Ingraham JL and Niedhart FC (2006) *Microbe*. ASM Press, Washington  
1202 D.C.
- 1203 111. Schlesinger AP, Wang Y, Tadeo X, Millet O and Pielak GJ (2011) Macromolecular  
1204 crowding fails to fold a globular protein in cells. *J. Am. Chem. Soc.* 133:8082–8085.
- 1205 112. Schliwa M (2002) The evolving complexity of cytoplasmic structure. *Nature Rev. Mol.*  
1206 *Cell. Biol.* 3: 2-6

- 1207 113. Schwille P (2011) Bottom-up synthetic biology: engineering in a tinkerer's world. *Science*.  
1208 333:1254
- 1209 114. Schreiber G and Fersht AR (1996) Rapid, electrostatically assisted association of proteins.  
1210 *Nature Struct. Biol.* 3:427-431
- 1211 115. Scott M, Gunderson CW, Mateescu EM, Zhang Z and Hwa T (2010) Interdependence of  
1212 cell growth and gene expression: origins and consequences. *Science* 330: 1099-1102
- 1213 116. Shapiro R (1986) *Origins: a Skeptic's Guide to the Creation of Life on Earth*. Simon &  
1214 Schuster, New York
- 1215 117. Siegele DA and Kolter R (1992) Life after log. *J. Bacteriology* 174:345-348
- 1216 118. Solé RV, Rasmussen S, and Bedau M. (2007) Introduction. *Artificial protocells*. *Phil.*  
1217 *Trans. R. Soc. B* 362: 1725
- 1218 119. Southall NT, Dill KA and Haymet ADJ (2002) A view of the hydrophobic effect. *J. Phys.*  
1219 *Chem. B*, 106:521-533
- 1220 120. Spitzer J and Poolman B (2013) How crowded is the prokaryotic cytoplasm? *FEBS Letters*  
1221 587:2094–2098
- 1222 121. Spitzer J (2011) From water and ions to crowded biomacromolecules: *in vivo* structuring of  
1223 a prokaryotic cell. *Microbiol Mol Biol Revs* 75:491-506
- 1224 122. Spitzer J (2013) Emergence of life from multicomponent mixtures of chemicals: the case  
1225 for experiments with cycling physicochemical gradients. *Astrobiology* 13:404-413
- 1226 123. Spitzer J and Poolman B (2009) The role of biomacromolecular crowding, ionic strength  
1227 and physicochemical gradients in the complexities of life's emergence. *Microbiol. Mol.*  
1228 *Biol. Revs.* 73:371-388
- 1229 124. Spitzer JJ (2003) Maxwellian Double layer forces: from infinity to contact. *Langmuir*,  
1230 19:7099–7111
- 1231 125. Spitzer JJ, Poolman B (2005). Electrochemical structure of the crowded cytoplasm. *Trends*  
1232 *Biochem Sci* 30:536-541
- 1233 126. Spitzer JJ (1984) A re-interpretation of hydration forces. *Nature* 310:396-397.
- 1234 127. Srere PA (1985) The metabolon. *Trends Biochem. Sci.* 10:109-110.
- 1235 128. Stradner AH, Sedgwick F, Cardinaux WCK, Poon S, Egelhaaf U and Schurtenberger P  
1236 (2004) Equilibrium cluster formation in concentrated protein solutions and colloids. *Nature*  
1237 432:492-495.
- 1238 129. Stüeken EE, Anderson RE, Bowman JS, Brazelton WJ, Colangelos-Lillis J, Goldman AD,  
1239 Som SM and Baross JA (2013) Did life originate from a global chemical reactor?  
1240 *Geobiology* doi: 10.1111/gbi.12025
- 1241 130. Sullivan III WT and Baross JA (eds) (2007) *Planets and Life*. Cambridge University Press,  
1242 Cambridge UK
- 1243 131. Szostak JW (2012) Attempts to define life do not help to understand the origin of life. *J*  
1244 *Biomol. Struct. Dyn.* 29:599-600
- 1245 132. Szostak JW, Bartel, DP and Luisi, PL (2001) Synthesizing Life. *Nature* 409:387-390
- 1246 133. Tanford C (1980) *The Hydrophobic Effect: Formation of Micelles and Biological*  
1247 *Membranes*. John Wiley & Sons, New York

- 1248 134. Tompa P and Rose GD (2011) The Levinthal paradox of the interactome. *Protein Sci.*  
1249 20:2074-2079. doi:10.1002/pro/747
- 1250 135. Tremblay GY, Daniels MJ, Schaechter M (1969) Isolation of a cell membrane-DNA-  
1251 nascent RNA complex from bacteria. *J. Mol. Biol.* 40: 65-74, IN1, 75-76
- 1252 136. Trifonov EN (2012) Definition of life: navigation through uncertainties. *J Biomol. Struct.*  
1253 *Dyn.* 29:647-650
- 1254 137. Valkenburg JAC and Woldringh CL (1984) Phase separation between nucleoid and  
1255 cytoplasm in *Escherichia coli* as defined by immersive refractometry. *J. Bacteriol.*  
1256 160:1151-1157
- 1257 138. van den Bogaart G, Heermans N, Krasnikov V, and B. Poolman B (2007) Protein mobility  
1258 and diffusive barriers in *Escherichia coli*: consequences of osmotic stress. *Mol. Microbiol.*  
1259 64:858-871
- 1260 139. van der Heide T, Stuart MCA and Poolman B (2001) On the osmotic signal and  
1261 osmosensing mechanism of an ABC transport system for glycine betaine. *EMBO J.* 20:  
1262 7022-7032
- 1263 140. van Loosdrecht MCM, Lyklema J, Norde W, Schraa G and Zehnder AJ (1987)  
1264 Electrophoretic mobility and hydrophobicity as a measure to predict the initial steps of  
1265 bacterial adhesion. *Appl. Environ. Microbiol.* 53:1898-1901
- 1266 141. van Regenmortel, MHV (2004) Reductionism and complexity in molecular biology.  
1267 *EMBO Reports* 5:1016-1020
- 1268 142. Wagner MA, Zahrl D, Rieser G, and Koraimann G (2009) Growth phase and cell division-  
1269 dependent activation and inactivation of the  $\sigma^{32}$  regulon in *Escherichia coli*. *J. Bacteriol.*  
1270 191:1695-1702
- 1271 143. Walter H and Brooks DE (1995) Phase separation in cytoplasm, due to macromolecular  
1272 crowding, is the basis for microcompartmentation. *FEBS Letts.* 361:135-139
- 1273 144. Wang Q, Zhuravleva A, and Gierasch LM (2011) Exploring weak, transient protein-protein  
1274 interactions in crowded *in vivo* environments by in-cell nuclear magnetic resonance  
1275 spectroscopy. *Biochemistry* 50:9225-9236
- 1276 145. Welch, GR (1984) T.H. Huxley and the 'protoplasmic theory of life': 100 years later.  
1277 *Trends in Biochem. Sci.* 20:481-485
- 1278 146. White D (2000) *The Physiology and Biochemistry of Prokaryotes*. Oxford University  
1279 Press, New York & Oxford
- 1280 147. Whitesides GM and Ismagilov RF (1999) Complexity in Chemistry. *Science* 284:89-92
- 1281 148. Whitesides GM (2008) Foreword: The Improbability of Life. In *Fitness of the Cosmos for*  
1282 *Life: Biochemistry and Fine-tuning*. John D, Barrow, Simon Conway Morris, Stephen J.  
1283 Freeland, and Charles L. Harper (eds), Cambridge University Press, Cambridge UK
- 1284 149. Wijnen H and MW (2006) Interplay of circadian clocks and metabolic rhythms. *Annu.*  
1285 *Rev. Genet.* 40:409-48
- 1286 150. Woese CR and Fox GE (1977a) The concept of cellular evolution. *J Mol. Evol.* 10:1-6
- 1287 151. Woese CR and Fox GE (1977b) Phylogenetic structure of the prokaryotic domain: the  
1288 primary kingdoms. *PNAS* 74:5088-5090
- 1289 152. Woese CR (1998). The universal ancestor. *PNAS* 95:6854-6859

- 1290 153. Woldringh C L and Nanninga N (2006) Structural and physical aspects of bacterial  
1291 chromosome segregation. *J. Struct. Biol.* 156:273-283
- 1292 154. Wood J (2011) Osmotic Stress. In *Bacterial Stress Responses*, 2nd ed. (Storz, G. and  
1293 Hengge, R. eds.) ASM Press, Washington D.C.
- 1294 155. Yeung T, Gilbert GE, Shi J, Silvius J, Kapus A and Grinstein S (2008) Membrane  
1295 phosphatidylserine regulates surface charge and protein localization. *Science* 319:210-213.
- 1296 156. Yirme G, Amit M, Laevsky I, Osenberg S, Itskovitz-Eldor J (2008) Establishing a dynamic  
1297 process for the formation, propagation, and differentiation of human embryoid bodies.  
1298 *Stem Cell Dev.* 17:1227-1241
- 1299 157. Zhou H-X, Rivas G, and Minton AP (2008) Macromolecular crowding and confinement:  
1300 biochemical, biophysical and potential physiological consequences. *Annu. Rev. Biophys.*  
1301 37: 247-63
- 1302 158. Zimmerman SB and Minton AP (1993) Macromolecular crowding: biochemical,  
1303 biophysical, and physiological consequences. *Annu. Rev. Biophys. Biomol. Struct.* 22:27-  
1304 65
- 1305 159. Zimmerman SB and Murphy LD (2001) Release of compact nucleoids with characteristic  
1306 shapes from *Escherichia coli*. *J. Bacteriol.* 183:5041-5049
- 1307 160. Zimmerman SB and Trach SO (1991). Estimation of macromolecular concentrations and  
1308 excluded volume effects for the cytoplasm of *Escherichia coli*. *J Mol. Biol.* 222: 599-620
- 1309 161. Zuckerkandl E and Pauling L (1965) Molecules as documents of evolutionary history. *J.*  
1310 *Theoret. Biol.* 8:357-366
